# Supplementary material for: Recognition of interferon-inducible sites, promoters, and enhancers
Source: PubMed Central journal article supplement (PMC1810324; doi:10.1186/1471-2105-8-56), 2007-02-19

## Distribution of IRF1, ISGF3, STAT1, and NF-κB binding sites in different gene groups

X axis, position with respect to the transcription start site

Y axis, occurrence frequency of putative binding sites

Legend:

Glucocorticoid-regulated genes, blue

Genes of lipid metabolism, yellow

IFN-inducible genes, green

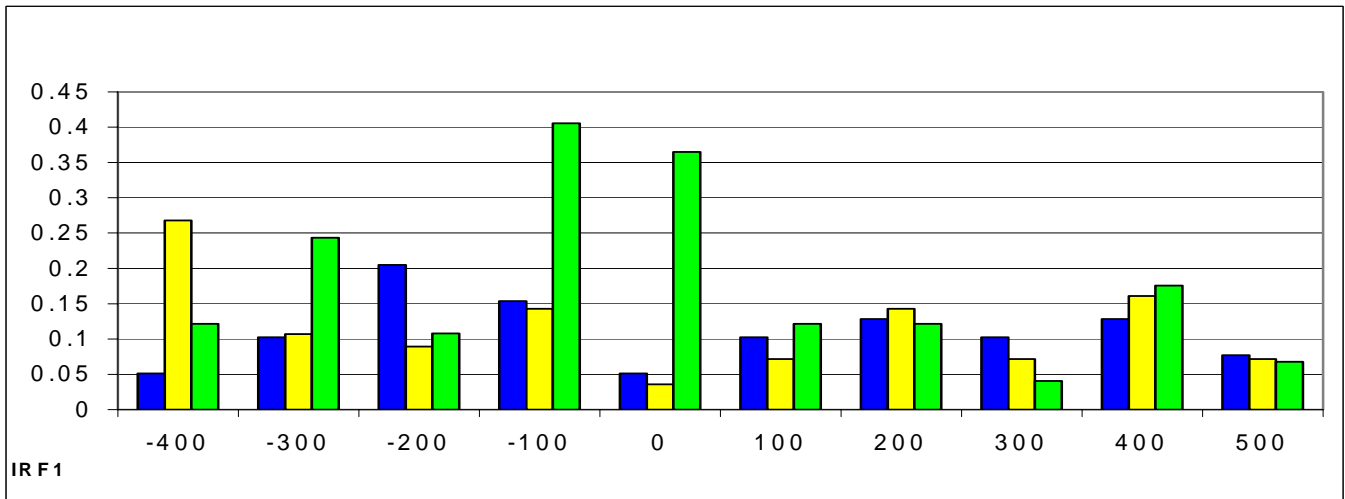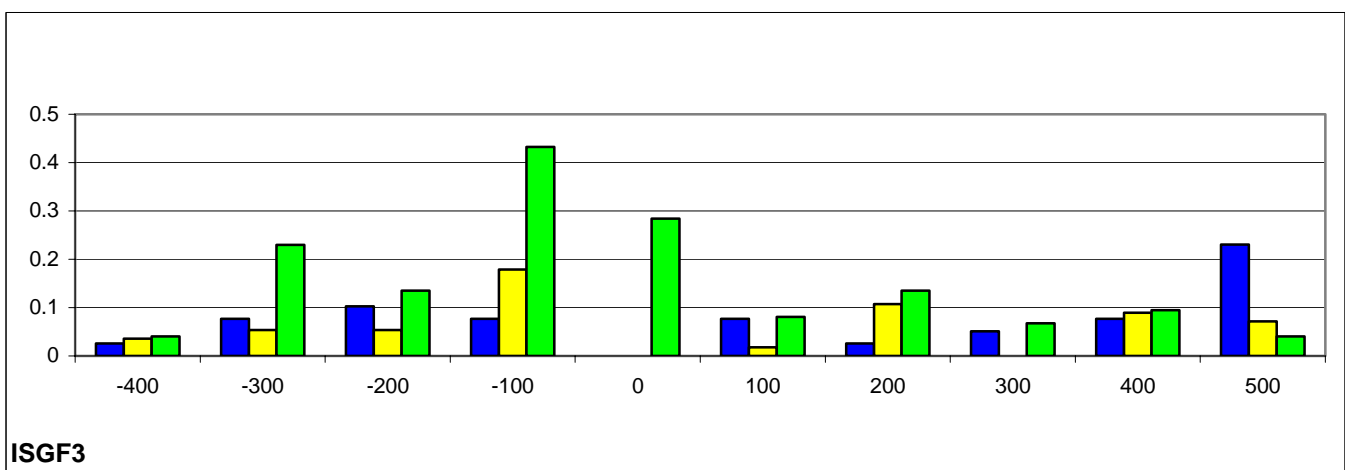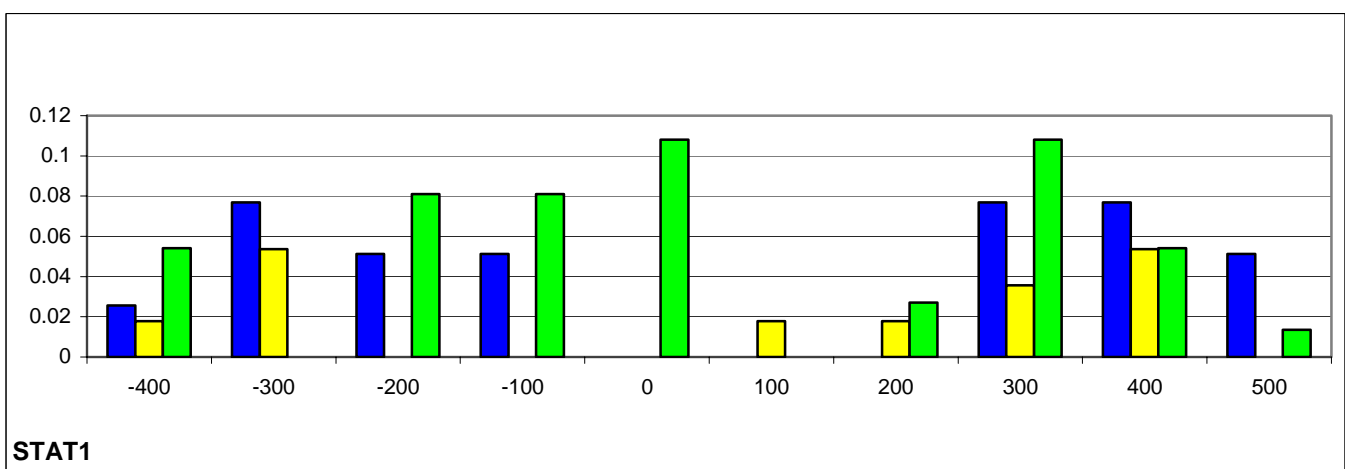

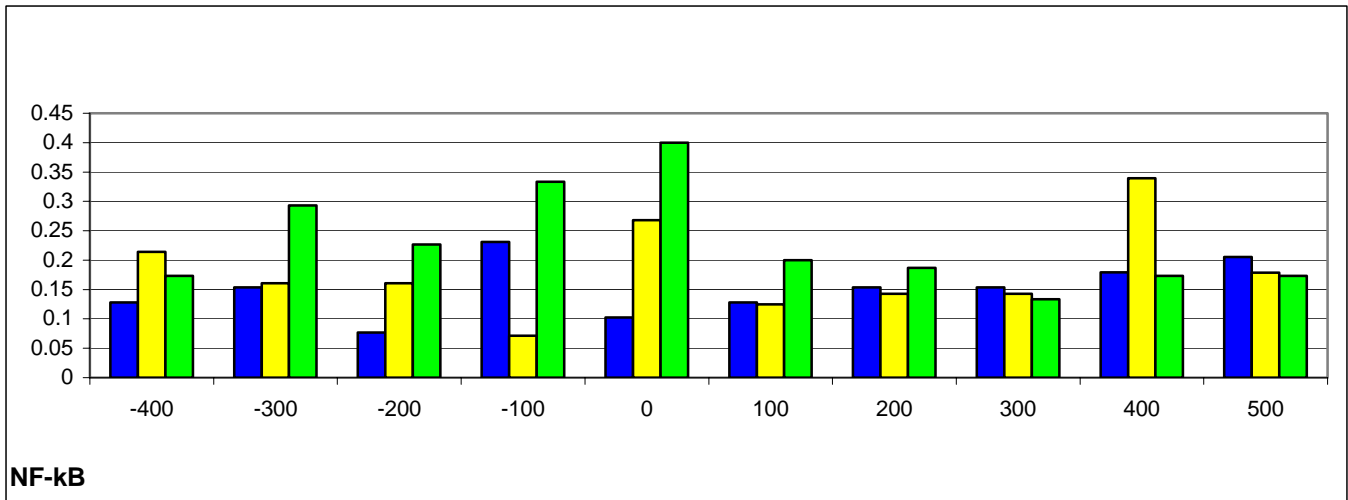

Supplement: 1471-2105-8-56-S1.pdf [file 1471-2105-8-56-S1.pdf]
